# Supplementary material
Source: PubMed Central journal article supplement (PMC6891165)
Supplement: NIHMS1538023-supplement-1.pdf [file NIHMS1538023-supplement-1.pdf]

Supplemental Materials for

**Response to anti-EGFR therapy in patients with BRAF non-V600 mutant metastatic colorectal cancer**

Rona Yaeger, Daisuke Kotani, Sebastián Mondaca, Aparna Parikh, Hideaki Bando, Emily Van Seventer, Hiroya Taniguchi, HuiYong Zhao, Claire Thant, Elisa de Stanchina, Neal Rosen, Ryan B. Corcoran, Takayuki Yoshino, Zhan Yao, Hiromichi Ebi

Supplementary Table S1. Classification of BRAF variants identified in this study

| <b>Class2</b>  |         |        | <b>Class 3</b> |         |        | <b>Unknown</b>                       |         |        |
|----------------|---------|--------|----------------|---------|--------|--------------------------------------|---------|--------|
| Mutation       | N (%)   | RAS mt | Mutation       | N (%)   | RAS mt | Mutation                             | N (%)   | RAS mt |
|                | 32 (27) | 2      |                | 72 (61) | 18     |                                      | 13 (11) | 11     |
| G464V          | 1       | 1      | G466E          | 5       | 3      | T241M                                | 1       | 1      |
| G469A          | 11      | 1      | G466V          | 2       | 1      | R271H                                | 1       | 1      |
| G469V          | 3       | 0      | G466R          | 1       | 1      | P277Hfs*2                            | 1       | 1      |
| L485F          | 1       | 0      | G469E          | 2       | 1      | Q285Tfs*3                            | 1       | 0      |
| L525R          | 1       | 0      | Q524L          | 1       | 0      | F294L                                | 1       | 1      |
| L597R          | 2       | 0      | N581I          | 2       | 1      | P403Lfs*8                            | 1       | 1      |
| K601E          | 7       | 0      | N581S          | 2       | 0      | A404Cfs*9                            | 1       | 1      |
| Fusion         | 3       | 0      | N581T          | 1       | 0      | Y472S                                | 1       | 1      |
| T599_V600TinsT | 1       | 0      | N581Y          | 1       | 1      | Y472dup                              | 1       | 1      |
| T599dup        | 2       | 0      | D594G          | 38      | 6      | E501K                                | 1       | 1      |
|                |         |        | D594N          | 8       | 1      | H574Y                                | 1       | 1      |
|                |         |        | D594A          | 1       | 1      | F583C                                | 1       | 0      |
|                |         |        | D594E          | 1       | 1      | S602Y                                | 1       | 1      |
|                |         |        | D594V          | 1       | 1      |                                      |         |        |
|                |         |        | F595L          | 2       | 0      | <b>No Effect on ERK signal (N.E)</b> |         |        |
|                |         |        | G596R          | 1       | 0      | A33T                                 | 1       | 0      |
|                |         |        | F247L          | 2       | 0      |                                      |         |        |
|                |         |        | R558Q          | 1       | 0      |                                      |         |        |

Supplementary Table S2. Patient characteristics based on *BRAF* classification

|                         |                   | Class 2<br>n = 32 | Class 3<br>n = 72 | Unknown or<br>no effect on<br>ERK signal<br>n = 14 | Total<br>n = 118<br>(%) | <i>P</i><br>Class 2 vs 3 |
|-------------------------|-------------------|-------------------|-------------------|----------------------------------------------------|-------------------------|--------------------------|
| Mean age, years [range] |                   | 58<br>[35-83]     | 59<br>[27-79]     | 50<br>[30-75]                                      | 58 (27-83)              |                          |
| Sex                     | Male              | 19                | 43                | 7                                                  | 69 (58.5)               | 1.00                     |
|                         | Female            | 13                | 29                | 7                                                  | 49 (41.5)               |                          |
| Primary site            | Right-sided colon | 13                | 19                | 6                                                  | 38 (32.2)               | 0.12                     |
|                         | Left-sided colon  | 12                | 22                | 6                                                  | 40 (33.9)               |                          |
|                         | Rectum            | 7                 | 30                | 2                                                  | 39 (33.1)               |                          |
|                         | Unknown           | 0                 | 1                 | 0                                                  | 1 (0.8)                 |                          |
| Mucinous histology      | Yes               | 1                 | 7                 | 3                                                  | 11 (9.3)                | 0.43                     |
|                         | No                | 29                | 60                | 7                                                  | 96 (81.4)               |                          |
|                         | Unknown           | 2                 | 5                 | 4                                                  | 11 (9.3)                |                          |
| Stage at diagnosis      | 1                 | 2                 | 2                 | 0                                                  | 4 (3.4)                 | 0.41                     |
|                         | 2                 | 1                 | 8                 | 2                                                  | 11 (9.3)                |                          |
|                         | 3                 | 4                 | 13                | 4                                                  | 21 (17.8)               |                          |
|                         | 4                 | 22                | 46                | 8                                                  | 76 (64.4)               |                          |
|                         | Unknown           | 3                 | 3                 | 0                                                  | 6 (5.1)                 |                          |
| Adjuvant chemotherapy   | Yes               | 6                 | 17                | 6                                                  | 29 (24.6)               | 0.80                     |
|                         | No                | 26                | 55                | 8                                                  | 89 (75.4)               |                          |
| RAS                     | Wild-type         | 29                | 53                | 3                                                  | 85 (72.0)               | 0.03                     |
|                         | Mutant            | 2                 | 18                | 11                                                 | 31 (26.3)               |                          |
|                         | Missing           | 1                 | 1                 | 0                                                  | 2 (1.7)                 |                          |
| MSI (MMR)               | MSI-H (dMMR)      | 1                 | 0                 | 2                                                  | 3 (2.5)                 | 0.31                     |
|                         | MSS (pMMR)        | 18                | 43                | 12                                                 | 73 (61.9)               |                          |
|                         | Missing           | 13                | 29                | 0                                                  | 42 (35.6)               |                          |

MSI-H identified in patients with BRAF G469A (n=1), A33T (n=1), and P403Lfs\*8 (n=1).

Supplementary Table S3. Characteristics of patients treated with anti-EGFR antibody therapy

|                           |                   | Class 2<br>n=12 | Class 3<br>n=28 | Total<br>N=40 | <i>P</i><br>(class 2 vs. 3) |
|---------------------------|-------------------|-----------------|-----------------|---------------|-----------------------------|
| Median age, years [range] |                   | 56 [35-70]      | 56 [29-77]      | 56 [29-77]    |                             |
| Sex                       | Male              | 5               | 15              | 20<br>(50.0)  | 0.73                        |
|                           | Female            | 7               | 13              | 20<br>(50.0)  |                             |
| Primary site              | Right-sided colon | 3               | 7               | 10<br>(25.0)  | 0.40                        |
|                           | Left-sided colon  | 5               | 6               | 11<br>(27.5)  |                             |
|                           | Rectum            | 4               | 14              | 18<br>(45.0)  |                             |
|                           | Unknown           | 0               | 1               | 1<br>(2.5)    |                             |
| Mucinous histology        | Yes               | 0               | 1               | 1<br>(2.5)    | 1.00                        |
|                           | No                | 12              | 25              | 37<br>(92.5)  |                             |
|                           | Unknown           | 0               | 2               | 2<br>(5.0)    |                             |
| Stage at diagnosis        | 1                 | 0               | 1               | 1<br>(2.5)    | 0.21                        |
|                           | 2                 | 0               | 2               | 2<br>(5.0)    |                             |
|                           | 3                 | 1               | 4               | 5<br>(12.5)   |                             |
|                           | 4                 | 8               | 18              | 26<br>(65.0)  |                             |
|                           | Unknown           | 3               | 3               | 6<br>(15.0)   |                             |
| Adjuvant chemotherapy     | Yes               | 4               | 8               | 12<br>(30.0)  | 1.00                        |
|                           | No                | 8               | 20              | 28<br>(70.0)  |                             |
| MSI (MMR)                 | MSI-H (dMMR)      | 0               | 0               | 0<br>(0.0)    | 1.00                        |
|                           | MSS (pMMR)        | 6               | 12              | 18<br>(45.0)  |                             |
|                           | Missing           | 6               | 16              | 22<br>(55.0)  |                             |

Supplementary Table S4. Response to anti-EGFR antibody therapy based on BRAF classification and the sidedness of the tumor

|                    | Class 2         |                   | Class 3         |                   | <i>P</i> |
|--------------------|-----------------|-------------------|-----------------|-------------------|----------|
|                    | No. of patients | No. Responded (%) | No. of patients | No. Responded (%) |          |
| <b>Right-sided</b> | 3               | 0 (0)             | 7               | 2 (29)            | 0.47     |
| <b>Left-sided</b>  | 9               | 1 (12)            | 20              | 12 (60)           | 0.02     |
| <b>Total</b>       | 12              | 1 (8)             | 27*             | 14 (52)           | 0.01     |

\* Sidedness was unknown in one patient with class 3 BRAF mutation.

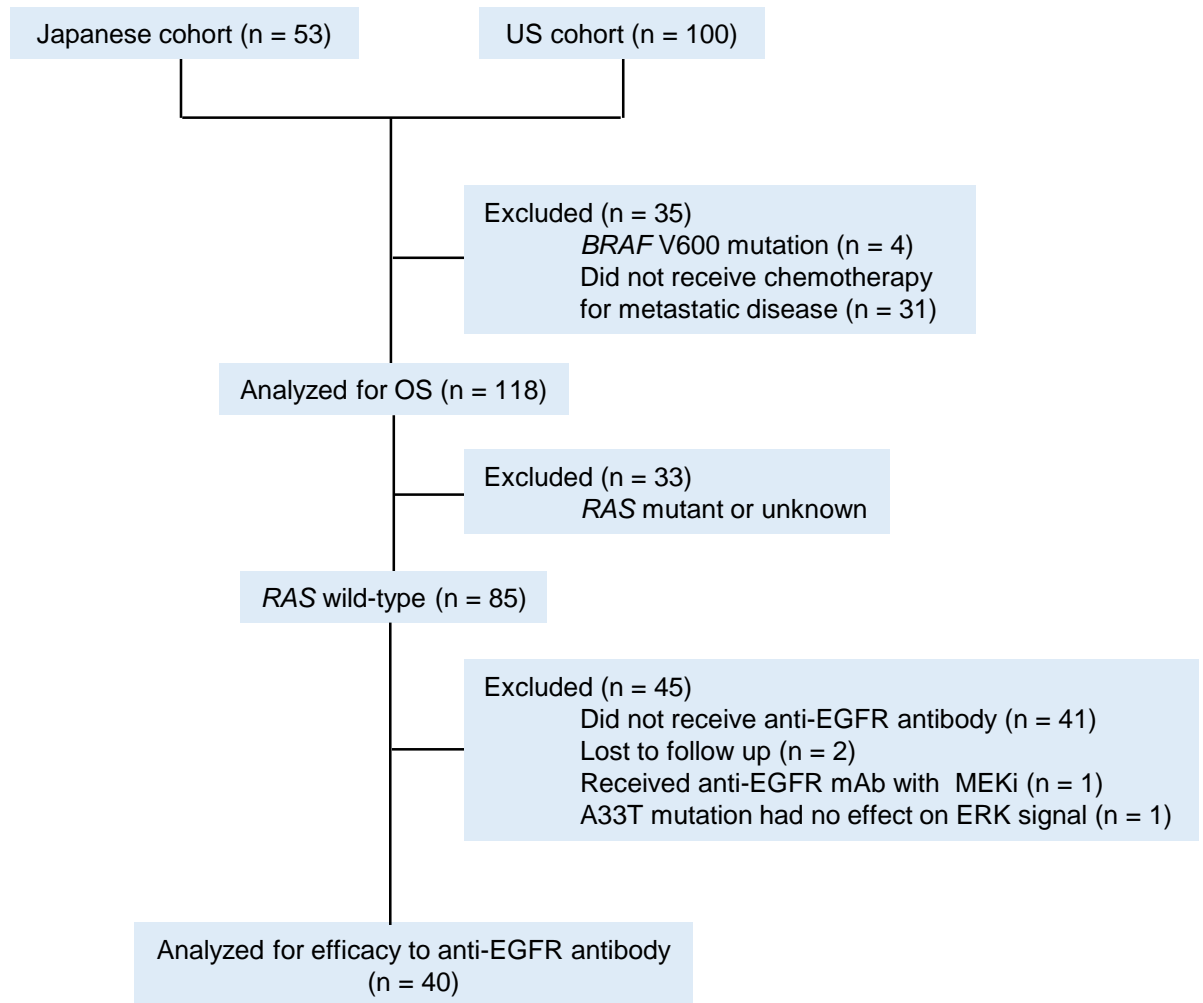

Supplementary Fig. S1. CONSORT diagram.



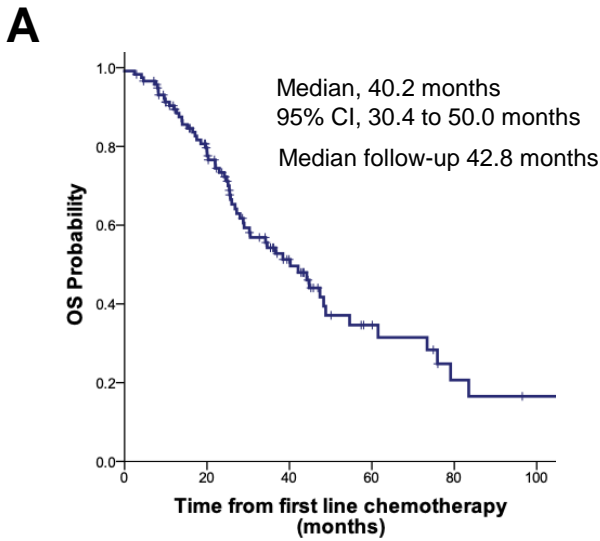

No. at risk:

118 78 31 12 5 3

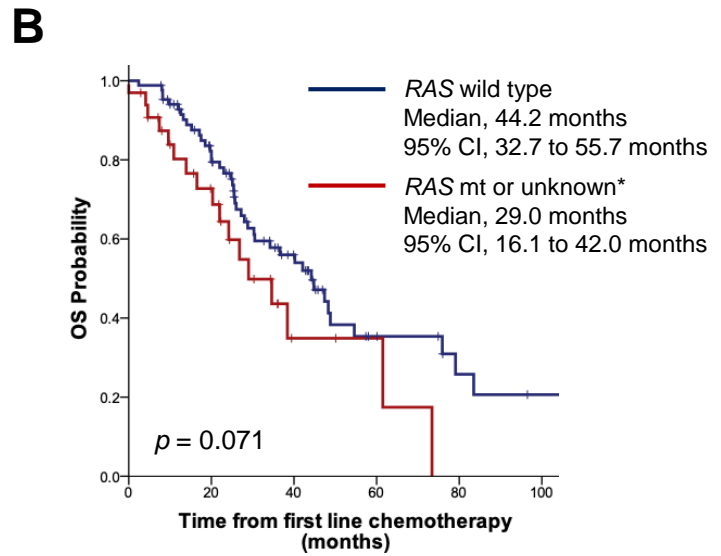

No. at risk:

|                   |    |    |    |    |   |   |
|-------------------|----|----|----|----|---|---|
| RAS wt            | 85 | 60 | 28 | 10 | 5 | 3 |
| RAS mt or unknown | 33 | 18 | 3  | 2  | 0 | 0 |

\*RAS status was unknown in two patients

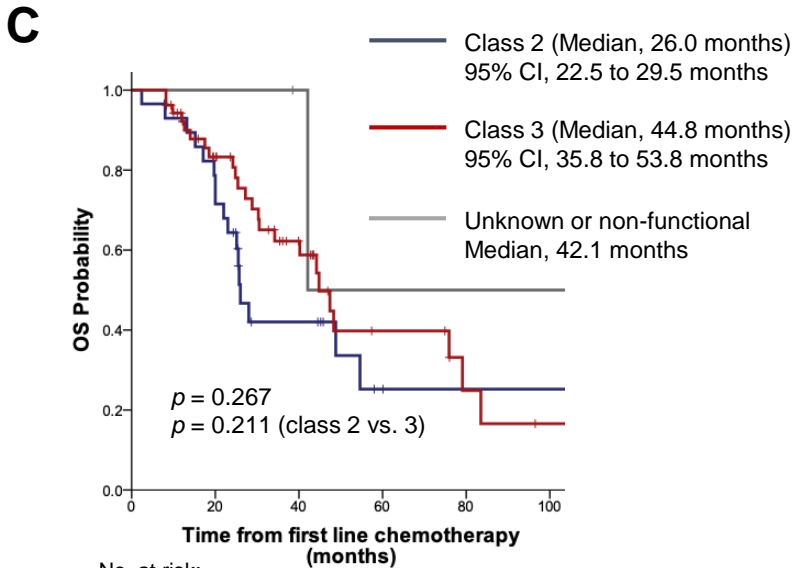

No. at risk:

|         |    |    |    |   |   |   |
|---------|----|----|----|---|---|---|
| Class 2 | 29 | 22 | 8  | 2 | 1 | 1 |
| Class 3 | 53 | 35 | 18 | 7 | 3 | 1 |

|                                    |   |   |   |   |   |   |
|------------------------------------|---|---|---|---|---|---|
| Unknown or no effect on ERK signal | 3 | 3 | 2 | 1 | 1 | 1 |
|------------------------------------|---|---|---|---|---|---|

Supplementary Fig. S3. OS in all patients with *BRAF* non-V600 mutation (A) and stratified by *RAS* mutation (B), or stratified by *BRAF* classification in patients with *RAS* wild-type tumors (C).
